# Supplementary material for: RAGE is a nucleic acid receptor that promotes inflammatory responses to DNA
Source: PubMed Central journal article supplement — J Exp Med. 2013 Oct 21;210(11):2447–63. doi: 10.1084/jem.20120201 (PMC3804942; doi:10.1084/jem.20120201), 2013-10-21
Supplement: supp_jem.20120201_JEM_20120201_sm.pdf [file supp_jem.20120201_JEM_20120201_sm.pdf]

## SUPPLEMENTAL MATERIAL

Sirois et al., <http://www.jem.org/cgi/content/full/jem.20120201/DC1>**Table S1.** Oligonucleotide sequences and sources

|             | Sequence (5'-3')                                               | Notes                                                     | Sources     |
|-------------|----------------------------------------------------------------|-----------------------------------------------------------|-------------|
| ODN 752     | CCATGACTGTAGGAACTCTAG                                          | Used in 2.8 Å crystal, sense strand                       | IDT         |
| ODN 753     | GCTAGAGTTTCTACAGTCATG                                          | Used in 2.8 Å crystal, antisense strand                   | IDT         |
| ODN 787     | CCATCAAAGAGAGAAAGAGC                                           | Used in fluorescence polarization assay, sense strand     | IDT         |
| ODN 788     | GCTCTTCTCTTTGATGG                                              | Used in fluorescence polarization assay, antisense strand | IDT         |
| ODN 981     | CTGCAACGATGCTACGAACGTG                                         | Used in 3.1 Å crystal, sense strand                       | IDT         |
| ODN 982     | CACGTTTCGTAGCATCGTTGCAG                                        | Used in 3.1 Å crystal, antisense strand                   | IDT         |
| ODN 1826    | T*C*C*A*T*G*A*C*G*T*T*C*C*G*A*C*G*T*T                          | CpG-B, optimal mouse-stimulatory                          | TriLink     |
| ODN 2006 PS | T*C*G*T*C*G*T*T*T*G*T*C*G*T*T*T*G*T*C*G*T*T                    | CpG-B, optimal human-stimulatory                          | IDT, Operon |
| ODN 2006 PO | TCGTCGTTTTGTCGTTTTGTCGTT                                       | CpG-B, human stimulatory, phosphodiester                  | IDT, Operon |
| ODN 2336    | G*G*GGACGACGTCGTGG*G*G*G*G                                     | CpG-A                                                     | IDT, Operon |
| ODN 2395    | T*C*G*T*C*G*T*T*T*T*C*G*C*G*C*G*C*G*C*G                        | CpG-C                                                     | Operon      |
| ORN 9.2s PO | rArGrCrUrUrArArCrCrUrGrUrCrCrUrUrCrArArUrU                     | GFP siRNA-derived sequence, sense strand                  | IDT         |
| ORN 9.2s PS | rA*rG*rC*rU*rU*rA*rA*rC*rC*rU*rG*rU*rC*rC*rU*rU*rC*rA*rA*rU*rU | GFP siRNA-derived sequence, sense strand                  | IDT         |

Linkages are phosphodiester bonds between deoxynucleotides unless indicated: \*, phosphorothioate linkage; r, ribonucleotide. Labeled ODN had biotin (TEG linkage) or Alexa Fluor 647 (AmC7 linkage) attached to the 3' end, or fluorescein attached to the 5' end. Sources: Integrated DNA Technologies (IDT); Trilink BioTechnologies, Inc.; Eurofins MWG Operon. Multiple lots of ODN were used throughout studies with no appreciable differences in activity.
